# Supplementary material for: Poly-lysine supported cross-linked enzyme aggregates with efficient enzymatic activity and high operational stability
Source: Royal Society of Chemistry journal article supplement (doi:10.1039/c1cy00084e), 2011-01-01
Supplement: c1cy00084e.pdf [file c1cy00084e.pdf]

## **Electronic Supplementary Information**

### **Poly-lysine supported cross-linked enzyme aggregates with efficient enzymatic activity and high operational stability**

Hiroshi Yamaguchi,<sup>a</sup> Masaya Miyazaki\*<sup>a,b</sup>, Yuya Asanomi<sup>a</sup> and Hideaki Maeda<sup>a,b</sup>

<sup>a</sup> *Measurement Solution Research Center, National Institute of Advanced Industrial Science and Technology, Tosu, Saga 841-0052, Japan.*

<sup>b</sup> *Department of Molecular and Material Sciences, Interdisciplinary Graduate School of Engineering Science, Kyushu University, Kasuga, Fukuoka 816-8580, Japan.*

*Fax: +81-942-81-3627; Tel: +81-942-81-4059; E-mail: m.miyazaki@aist.go.jp*

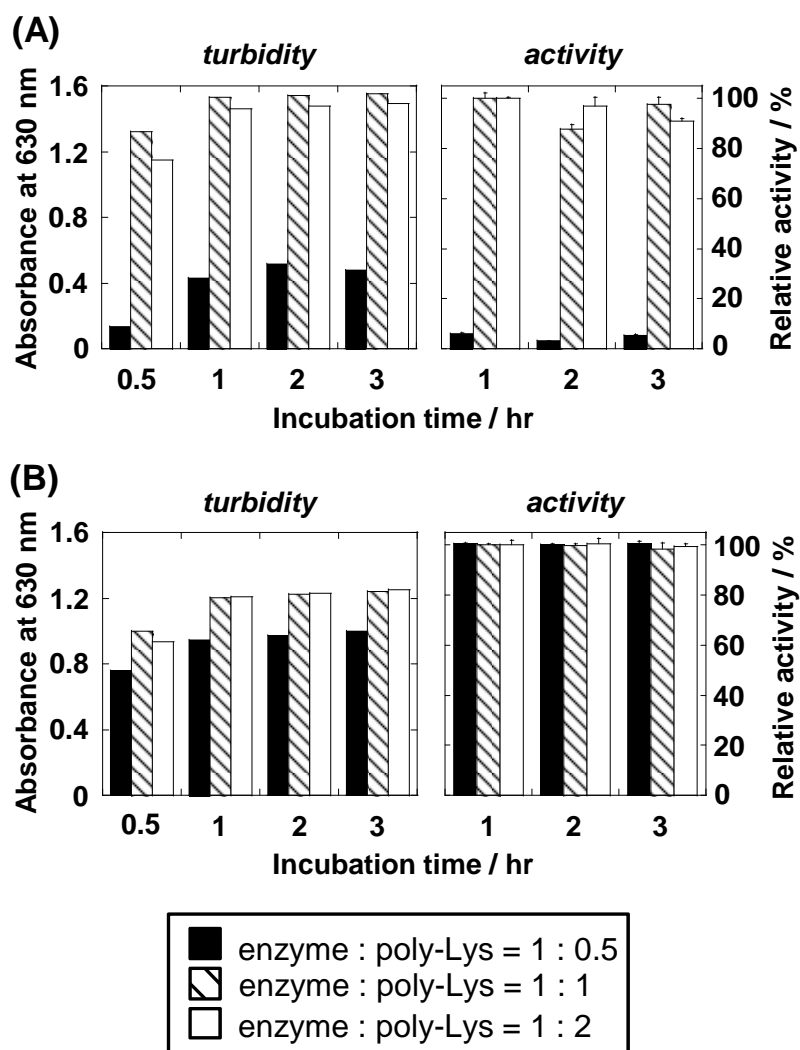

**Fig. S1** Effect of poly-Lys on CLEA formation and hydrolytic activity for CT (A) and SBc (B). The cross-linking reaction was conducted at 4°C with the mixture of PA (4%, v/v) and GA (0.25%, v/v). The turbidity of the reaction mixture was measured by the absorbance at 630 nm. Hydrolytic reactions were conducted in 20 mM PB (pH 7.5) at 30°C. Substrate: GPNA (1 mM) for CT-CLEA; Suc-AAPF-pNA (200 μM) for SBc-CLEA. The graph shows the mean ± standard error for at least three experiments.

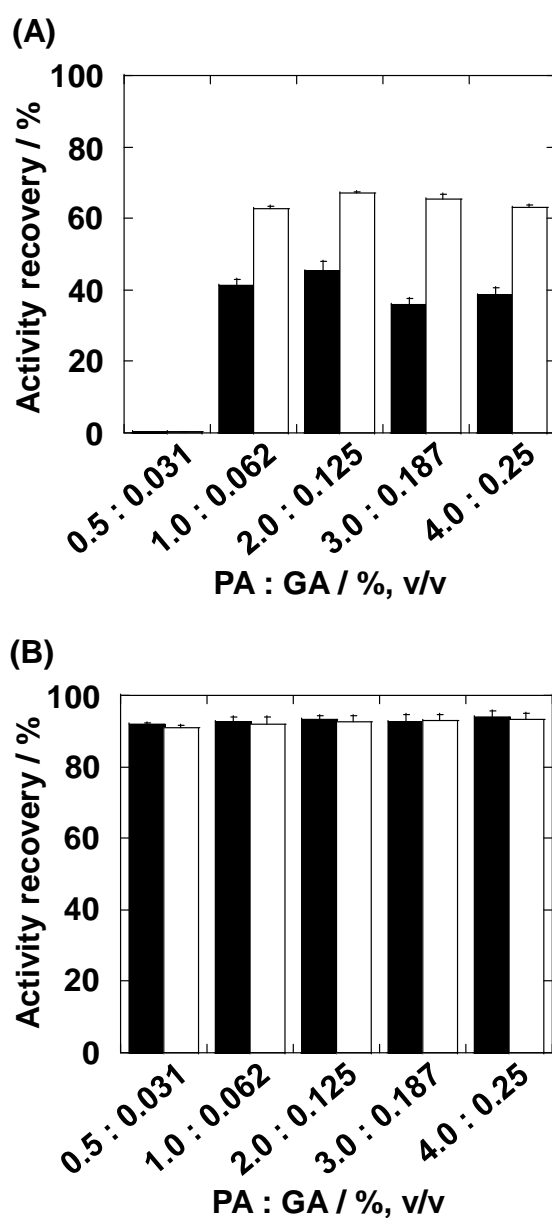

**Fig. S2** Enzymatic activities of CT-CLEA (A) and SBc-CLEA (B) prepared using different concentrations of cross-linker (PA and GA). The ratio of PA to GA was constantly 16:1 (v/v). All assays were performed in 20 mM PB (pH 7.5) at 30°C (closed bars) and 50°C (open bars). Concentrations of free CT and free SBc were 50 and 2  $\mu\text{g mL}^{-1}$ , respectively. Other experimental conditions were identical to those in Fig. S1. The results are presented as the activity recovery to free proteases at 30°C. The graph shows the mean  $\pm$  standard error for at least three experiments.

**Table S1.** Kinetic parameters for the hydrolysis of GPNA by CT-CLEA at pH 7.5 or pH 5.5<sup>a</sup>

| PA:GA<br>%:% (v/v)       | pH 7.5        |                                   |                                                       | pH 5.5        |                                   |                                                       |
|--------------------------|---------------|-----------------------------------|-------------------------------------------------------|---------------|-----------------------------------|-------------------------------------------------------|
|                          | $K_m$<br>(mM) | $k_{cat}$<br>(min <sup>-1</sup> ) | $k_{cat}/K_m$<br>(M <sup>-1</sup> min <sup>-1</sup> ) | $K_m$<br>(mM) | $k_{cat}$<br>(min <sup>-1</sup> ) | $k_{cat}/K_m$<br>(M <sup>-1</sup> min <sup>-1</sup> ) |
| 1.0:0.062                | 1.15 ± 0.13   | 0.49 ± 0.03                       | 426                                                   | 0.56 ± 0.05   | 0.40 ± 0.02                       | 714                                                   |
| 2.0:0.125                | 0.89 ± 0.05   | 0.53 ± 0.02                       | 596                                                   | 0.47 ± 0.01   | 0.49 ± 0.003                      | 1043                                                  |
| 3.0:0.187                | 1.40 ± 0.18   | 0.80 ± 0.06                       | 571                                                   | 0.56 ± 0.05   | 0.65 ± 0.02                       | 1161                                                  |
| 4.0:0.25                 | 0.90 ± 0.05   | 0.46 ± 0.01                       | 511                                                   | 0.43 ± 0.02   | 0.46 ± 0.01                       | 1070                                                  |
| In solution <sup>b</sup> | 1.57 ± 0.29   | 1.02 ± 0.09                       | 650                                                   | 3.64 ± 1.37   | 0.71 ± 0.19                       | 195                                                   |

Values represent averages from results obtained from 2–3 independent experiments. <sup>a</sup> Reactions were conducted at 30°C. <sup>b</sup> Concentration of CT was 50 µg mL<sup>-1</sup>.

**Table S2** Kinetic parameters for the hydrolysis of Suc-AAPF-*p*NA by SBc-CLEA at pH 7.5 or pH 5.5<sup>a</sup>

| PA:GA<br>%:%, (v/v)      | pH 7.5        |                                   |                                                       | pH 5.5        |                                   |                                                       |
|--------------------------|---------------|-----------------------------------|-------------------------------------------------------|---------------|-----------------------------------|-------------------------------------------------------|
|                          | $K_m$<br>(mM) | $k_{cat}$<br>(min <sup>-1</sup> ) | $k_{cat}/K_m$<br>(M <sup>-1</sup> min <sup>-1</sup> ) | $K_m$<br>(mM) | $k_{cat}$<br>(min <sup>-1</sup> ) | $k_{cat}/K_m$<br>(M <sup>-1</sup> min <sup>-1</sup> ) |
| 0.5:0.031                | 2.36 ± 1.14   | 28 ± 0.1                          | 12 × 10 <sup>3</sup>                                  | 0.54 ± 0.03   | 6 ± 0.2                           | 11 × 10 <sup>3</sup>                                  |
| 4.0:0.25                 | 2.54 ± 0.26   | 34 ± 3                            | 13 × 10 <sup>3</sup>                                  | 0.89 ± 0.09   | 9 ± 0.6                           | 10 × 10 <sup>3</sup>                                  |
| In solution <sup>b</sup> | 3.36 ± 0.25   | 17944 ± 1143                      | 5341 × 10 <sup>3</sup>                                | 0.63 ± 0.03   | 582 ± 13                          | 923 × 10 <sup>3</sup>                                 |

Values represent averages of results obtained from 2–3 independent experiments. <sup>a</sup> Reactions were conducted at 30°C. <sup>b</sup> Concentration of SBc was 2 µg mL<sup>-1</sup>.
